# Supplementary material for: A generic framework for individual-based modelling and physical-biological interaction
Source: PLOS journal article supplement (doi:10.1371/journal.pone.0189956), 2018-01-19
Supplement: S7 (10.1371/journal.pone.0189956.s007) [file journal.pone.0189956.s007]

## S7 Additional implementation details for biology modules

In the IBMlib root folder, a sub folder `biology_providers` provides a set of biology template modules, spanning different species featuring different biological complexity, as well as basic minimal types, like `generic_larvae`, or testing modules each implementing the biology interface. `state_attributes` is a Fortran90 derived type (called a class in object-oriented lingo) with arbitrary content describing/logging all aspects of the particle beyond generic spatio-temporal properties. `init_particle_state` allows to allocate and initialize module data, e.g. common parameters or maps and `close_particle_state` allows to deallocate biology module data `init_state_attributes` will initialize an instances of `particle_state` and possibly also set certain space attributes (like boundary conditions and mobility). `get_active_velocity` will return the current motion velocity vector (in relation to the water mass) for the particle, in relation to its current state and ambient conditions. `update_particle_state` will propagate the internal states of a `state_attributes` instance corresponding to a positive/negative time step. `delete_state_attributes` is the destructor associated with `state_attributes` (that should deallocate pointers, if allocated to avoid memory leakage, and reset data fields). Finally `write_state_attributes` print `particle_state` content in a readable form to stdout for debugging. Most services in the biological API has a few generic arguments; we refer to the code documentation for a listing of the subroutine call interface. `update_particle_state` in the biology module implements Eq. 2 by computing the internal state increment rate  $G_i$ , whereas Eq. 1, which is generic, is handled by the IBMlib core library. Running Lagrangian backtracking requires that `update_particle_state` in the biology module accepts negative time steps.
